# Supplementary material for: Barriers To and Strategies To Address COVID-19 Testing and Testing Hesitancy: A Rapid Scoping Review
Source: Research Square preprint supplement (doi:10.21203/rs.3.rs-944801/v1), 2021-10-08

# Appendix A

**Search strategy details**

All database searches were executed on January 8, 2021.

**Ovid MEDLINE**

*COVID-19 filter: adapted from Ovid filter (*[*https://tools.ovid.com/coronavirus/Covid-19%20search%20notes.pdf*](https://tools.ovid.com/coronavirus/Covid-19%20search%20notes.pdf)*); SARS/MERS & HIV literature not expressly excluded*

| **#** | **Query** |
| --- | --- |
| 1 | exp Coronavirus/ |
| 2 | exp Coronavirus Infections/ |
| 3 | (coronavirus* or corona virus* or oc43 or nl63 or 229e or hku1 or hcov* or ncov* or covid* or sarscov* or sarscov* or sars-coronavirus* or severe acute respiratory syndrome coronavirus*).mp. |
| 4 | (or/1-3) and ((20191* or 202*).dp. or 20190101:20301231.(ep).) |
| 5 | ((pneumonia or covid* or coronavirus* or corona virus* or ncov* or 2019-ncov or sars*).mp. or exp pneumonia/) and Wuhan.mp. |
| 6 | (2019-ncov or ncov19 or ncov-19 or sars-cov2 or sars-cov-2 or sarscov2 or sarscov-2 or sarscoronavirus2 or sars-coronavirus-2 or coronavirus-19 or covid19 or covid-19 or covid 2019 or "2019-novel cov" or ((novel or new or nouveau) adj2 (cov or ncov or covid or coronavirus* or corona virus or pandemi*2)) or (coronavirus* and pneumonia)).mp. |
| 7 | covid-19.rx,px,ox. or severe acute respiratory syndrome coronavirus 2.os. |
| 8 | or/5-7 |
| 9 | 4 not (camel* or dromedar* or equine or coronary or coronal or covidence* or covidien or influenza virus or bovine or calves or tgev or feline or porcine or erinaceus or bcov or ped or pedv or pdcov or fipv or fcov or canine or ccov or zoonotic or avian influenza or h1n1 or h5n1 or h5n6 or ibv or murine corona*).mp. |
| 10 | 8 and (camel* or dromedar* or equine or coronary or coronal or covidence* or covidien or influenza virus or bovine or calves or tgev or feline or porcine or erinaceus or bcov or ped or pedv or pdcov or fipv or fcov or canine or ccov or zoonotic or avian influenza or h1n1 or h5n1 or h5n6 or ibv or murine corona*).mp. |
| 11 | or/8-10 |
| 12 | 11 and 20191201:20301231.(dt). |
| 13 | ((test* or screen* or pcr or rt-pcr or qt-pcr or lamp or contact tracing or contact investigation* or contact screening or contact epidemiology) adj5 (access* or attitud* or behavio?r* or aversion? or hesitanc* or objection? or oppos* or reluctan* or resist* or barrier* or deter or deters or deterred or difficult* or discourage* or hindrance* or hinder* or hurdle* or impediment* or obstacle* or (chang* adj2 mind?) or convinc* or galvani* or motivat* or persuad* or persuas* or ease? or easing or expedit* or facilitat* or help? or helping or promot* or equality or equit* or inequality or inequit* or fair or fairly or fairness or shame* or stigma*)).ti,ab,kw,kf. |
| 14 | ((test* or screen* or pcr or rt-pcr or qt-pcr or lamp or contact tracing or contact investigation* or contact screening or contact epidemiology) adj5 (population group* or ethnic group* or "sub group*" or ethnic population* or "sub population*" or ethnically diverse or poverty or impoverished or low income or low resource* or socioeconomic* or socio-economic* or ((rural* or remote* or isolated) adj2 (population* or area? or communit* or place?)) or "at risk" or minorit* or vulnerable or disparate* or disparit* or immigrant* or migrant* or foreign* or newcomer* or illegal alien* or expat* or ex-pat* or emigrant* or refugee* or indigenous or aboriginal* or first nations or native american* or maori? or african american* or black or bame or bme or "person* of colo?r" or "people of colo?r" or bipoc or latina? or latino? or latinx or latin american* or hispanic? or spanish speaking or lesbian* or gay* or bisexual* or homosexual* or queer* or same sex or same gender or sexual minorit* or trans or transgender* or transsexual* or lgbt* or glbt* or prison* or imprison* or incarcerate* or inmate* or convict* or jail* or correctional facilit* or detention facilit* or penitentiar*)).ti,ab,kw,kf. |
| 15 | 13 or 14 |
| 16 | 12 and 15 |

**Scopus**

MEDLINE results have been removed from Scopus results using *AND NOT INDEX(medline)*

| **#** | **Query** |
| --- | --- |
| 1 | ( ( TITLE-ABS-KEY ( coronavirus* OR "corona virus*" OR oc43 OR nl63 OR 229e OR hku1 OR hcov* OR ncov* OR covid* OR sarscov* OR sarscov* OR "sars-coronavirus*" OR "severe acute respiratory syndrome coronavirus*" ) ) AND NOT ( TITLE-ABS-KEY ( camel* OR dromedar* OR equine OR coronary OR coronal OR covidence* OR covidien OR "influenza virus" OR bovine OR calves OR tgev OR feline OR porcine OR erinaceus OR bcov OR ped OR pedv OR pdcov OR fipv OR fcov OR canine OR ccov OR zoonotic OR "avian influenza" OR h1n1 OR h5n1 OR h5n6 OR ibv OR "murine corona*" ) ) ) OR ( ( TITLE-ABS-KEY ( "2019-ncov" OR ncov19 OR "ncov-19" OR "sars-cov2" OR "sars-cov-2" OR sarscov2 OR "sarscov-2" OR sarscoronavirus2 OR "sars-coronavirus-2" OR "coronavirus-19" OR covid19 OR "covid-19" OR "covid 2019" OR "2019-novel cov" OR ( ( novel OR new OR nouveau ) W/2 ( cov OR ncov OR covid OR coronavirus* OR "corona virus" OR pandemic* ) ) OR ( coronavirus* AND pneumonia ) ) ) AND ( TITLE-ABS-KEY ( camel* OR dromedar* OR equine OR coronary OR coronal OR covidence* OR covidien OR "influenza virus" OR bovine OR calves OR tgev OR feline OR porcine OR erinaceus OR bcov OR ped OR pedv OR pdcov OR fipv OR fcov OR canine OR ccov OR zoonotic OR "avian influenza" OR h1n1 OR h5n1 OR h5n6 OR ibv OR "murine corona*" ) ) ) AND ( LIMIT-TO ( PUBYEAR , 2021 ) OR LIMIT-TO ( PUBYEAR , 2020 ) OR LIMIT-TO ( PUBYEAR , 2019 ) ) |
| 2 | TITLE-ABS-KEY ( ( test* OR screen* OR pcr OR "rt-pcr" OR "qt-pcr" OR lamp OR "contact tracing" OR "contact investigation*" OR "contact screening" OR "contact epidemiology" ) W/5 ( access* OR attitud* OR behavior* OR behaviour* OR aversion* OR hesitanc* OR objection* OR oppos* OR reluctan* OR resist* OR barrier* OR deter OR deters OR deterred OR difficult* OR discourage* OR hindrance* OR hinder* OR hurdle* OR impediment* OR obstacle* OR ( chang* W/2 mind* ) OR convinc* OR galvani* OR motivat* OR persuad* OR persuas* OR ease* OR easing OR expedit* OR facilitat* OR help* OR promot* OR equality OR equit* OR inequality OR inequit* OR fair OR fairly OR fairness OR shame* OR stigma* ) ) |
| 3 | TITLE-ABS-KEY ( ( test* OR screen* OR pcr OR "rt-pcr" OR "qt-pcr" OR lamp OR "contact tracing" OR "contact investigation*" OR "contact screening" OR "contact epidemiology" ) W/5 ( "population group*" OR "ethnic group*" OR "sub group*" OR "ethnic population*" OR "sub population*" OR "ethnically diverse" OR poverty OR impoverished OR "low income" OR "low resource*" OR socioeconomic* OR "socio-economic*" OR ( ( rural* OR remote* OR isolated ) W/2 ( population* OR area* OR communit* OR place* ) ) OR "at risk" OR minorit* OR vulnerable OR disparate* OR disparit* OR immigrant* OR migrant* OR foreign* OR newcomer* OR "illegal alien*" OR expat* OR ex-pat* OR emigrant* OR refugee* OR indigenous OR aboriginal* OR "first nations" OR "native american*" OR maori? OR "african american*" OR black OR bame OR bme OR "person* of color" OR "person* or colour" OR "people of color" OR "people of colour" OR bipoc OR latina* OR latino* OR latinx OR "latin american*" OR hispanic* OR "spanish speaking" OR lesbian* OR gay* OR bisexual* OR homosexual* OR queer* OR "same sex" OR "same gender" OR "sexual minorit*" OR trans OR transgender* OR transsexual* OR lgbt* OR glbt* OR prison* OR imprison* OR incarcerate* OR inmate* OR convict* OR jail* OR "correctional facilit*" OR "detention facilit*" OR penitentiar* ) ) |
| 4 | #2 OR #3 |
| 5 | (#1 AND #4) AND NOT INDEX(medline) |

**medRxiv and bioRxiv**

Advanced search; medRxiv and bioRxiv; Abstract or Title field; select "all"; 25 per page; Best Match; export top 25 results (or all available if less than 25 results) for each search as of January 8, 2021.

| 1 | "covid-19" testing access |
| --- | --- |
| 2 | "covid-19" testing attitudes |
| 3 | "covid-19" testing behavior |
| 4 | "covid-19" testing hesitancy |
| 5 | "covid-19" testing equity |
| 6 | "covid-19" testing minority |
| 7 | "covid-19" testing vulnerable |
| 8 | "covid-19" testing disparity |
| 9 | "sars-cov-2" testing access |
| 10 | "sars-cov-2" testing attitudes |
| 11 | "sars-cov-2" testing behavior |
| 12 | "sars-cov-2" testing hesitancy |
| 13 | "sars-cov-2" testing equity |
| 14 | "sars-cov-2" testing minority |
| 15 | "sars-cov-2" testing vulnerable |
| 16 | "sars-cov-2" testing disparity |

**Cochrane Database of Systematic Reviews (CDSR)**

| **#** | **Query** |
| --- | --- |
| 1 | ("2019-ncov" OR ncov19 OR "ncov-19" OR "sars-cov2" OR "sars-cov-2" OR sarscov2 OR "sarscov-2" OR sarscoronavirus2 OR "sars-coronavirus-2" OR "coronavirus-19" OR covid19 OR "covid-19" OR "covid 2019" OR "2019-novel cov" OR ((novel OR new OR nouveau) near/2 (cov OR ncov OR covid OR coronavirus* OR "corona virus" OR pandemic*)) OR (coronavirus* AND pneumonia)):ti,ab |
| 2 | ((test* OR screen* OR pcr OR "rt-pcr" OR "qt-pcr" OR lamp OR "contact tracing" OR "contact investigation*" OR "contact screening" OR "contact epidemiology") near/5 (access* OR attitud* OR behavior* OR behaviour* OR aversion* OR hesitanc* OR objection* OR oppos* OR reluctan* OR resist* OR barrier* OR deter OR deters OR deterred OR difficult* OR discourage* OR hindrance* OR hinder* OR hurdle* OR impediment* OR obstacle* OR (chang* near/2 mind*) OR convinc* OR galvani* OR motivat* OR persuad* OR persuas* OR ease* OR easing OR expedit* OR facilitat* OR help* OR promot* OR equality OR equit* OR inequality OR inequit* OR fair OR fairly OR fairness OR shame* OR stigma*)):ti,ab |
| 3 | ((test* OR screen* OR pcr OR "rt-pcr" OR "qt-pcr" OR lamp OR "contact tracing" OR "contact investigation*" OR "contact screening" OR "contact epidemiology") near/5 ("population group*" OR "ethnic group*" OR "sub group*" OR "ethnic population*" OR "sub population*" OR "ethnically diverse" OR poverty OR impoverished OR "low income" OR "low resource*" OR socioeconomic* OR "socio-economic*" OR ((rural* OR remote* OR isolated) near/2 (population* OR area* OR communit* OR place*)) OR "at risk" OR minorit* OR vulnerable OR disparate* OR disparit* OR immigrant* OR migrant* OR foreign* OR newcomer* OR "illegal alien*" OR expat* OR ex-pat* OR emigrant* OR refugee* OR indigenous OR aboriginal* OR "first nations" OR "native american*" OR maori* OR "african american*" OR black OR bame OR bme OR "person* of color" OR "person* or colour" OR "people of color" OR "people of colour" OR bipoc OR latina* OR latino* OR latinx OR "latin american*" OR hispanic* OR "spanish speaking" OR lesbian* OR gay* OR bisexual* OR homosexual* OR queer* OR "same sex" OR "same gender" OR "sexual minorit*" OR trans OR transgender* OR transsexual* OR lgbt* OR glbt* OR prison* OR imprison* OR incarcerate* OR inmate* OR convict* OR jail* OR "correctional facilit*" OR "detention facilit*" OR penitentiar*)):ti,ab |
| 4 | #2 or #3 |
| 5 | #1 and #4 |

**Google**

Screening protocol: Go 2 pages (20 results) beyond the last result clicked

| " "covid-19" | coronavirus | "sars-cov-2" " " test | "contact tracing" " " attitude | behavior | aversion | hesitancy | objection | oppose | reluctance | resistance " |
| --- |
| " "covid-19" | coronavirus | "sars-cov-2" " " test | "contact tracing" " " barrier | deterred | difficulty | discouraged | hindered | hurdle | impediment | obstacle " |
| " "covid-19" | coronavirus | "sars-cov-2" " " test | "contact tracing" " " change minds | convince | galvanize | motivate | persuade " |
| " "covid-19" | coronavirus | "sars-cov-2" " " test | "contact tracing" " " ease | expedite | facilitate | help | promote " |
| " "covid-19" | coronavirus | "sars-cov-2" " " test | "contact tracing" " " equality | inequality | equity | inequity | fairness | shame | stigma " |
| " "covid-19" | coronavirus | "sars-cov-2" " " test | "contact tracing" " " "population group" | "ethnic group" | "sub group" | "ethnic population" | "sub population" | "ethnically diverse" " |
| " "covid-19" | coronavirus | "sars-cov-2" " " test | "contact tracing" " " poverty | impoverished | "low income" | "low resource" | socioeconomic | rural | remote " |
| " "covid-19" | coronavirus | "sars-cov-2" " " test | "contact tracing" " " "at risk" | minority | vulnerable | disparate | disparity | immigrant | migrant | foreign | newcomer | refugee " |
| " "covid-19" | coronavirus | "sars-cov-2" " " test | "contact tracing" " " indigenous | aboriginal | "first nations" | "native american" | maori " |
| " "covid-19" | coronavirus | "sars-cov-2" " " test | "contact tracing" " " "african american" | black american | "african canadian" | black canadian | black people | bame | bme | "people of color" | "people of colour" | bipoc " |
| " "covid-19" | coronavirus | "sars-cov-2" " " test | "contact tracing" " " latina | latino | latinx | "latin american" | hispanic | "spanish speaking" " |
| " "covid-19" | coronavirus | "sars-cov-2" " " test | "contact tracing" " " lesbian | gay | bisexual | homosexual | queer | "same sex" | "same gender" | "sexual minority" | trans | transgender | transsexual | lgbt | glbt | lgbtq | lgbtq+ | lgbtq2+ " |
| " "covid-19" | coronavirus | "sars-cov-2" " " test | "contact tracing" " " prison | imprisoned | incarcerated | inmate | convict | jail | "correctional facility" | "detention facility" | penitentiary " |

**Other Grey Literature Sources**

The following list of websites were searched for grey literature: OECD, WHO, CDC, ECDC, CADTH, National public health websites (e.g., Australia, UK, New Zealand, United States), Coronavirus resources (e.g., Johns Hopkins, COVID-END, CAN-COVID, CORD19).

#

# Appendix B: Inclusion/exclusion criteria

| **Include/Exclude** | **Criteria** |
| --- | --- |
| Include | COVID-19 |
| Include | Population: All demographics and population subgroups eligible |
| Include | Setting: any setting related to COVID-19 testing OR any learnings from previous infectious disease-related epidemics or pandemics applied to the COVID-19 response. |
| Include | Study design:  Published and pre-print pieces for academic journals (social science, science, and medicine); Research articles (multiple designs not just randomized control trails should be within scope); Letters; Commentary/perspectives/editorials; Grey literature (e.g. government, non-profits, etc.) |
| Include | Interventions: barriers to testing and strategies to address barriers to testing. Article should focus on individual behaviour/attitudes toward COVID-19 testing in any setting or population (ex. testing hesitancy, access to tests, access to information, economic impact of testing, the impact of repeat testing, and inequity) OR Article should focus on strategies to address individual behaviours toward barriers to testing |
| Exclude | non-COVID-19 |
| Exclude | Purely technical papers; sources that only focus on technical aspect of testing (efficacy, protocols, procedures, etc.)  Sources that only focus on testing outcomes  Sources on general testing strategies that do not address barriers to testing |

# Appendix C: PRISM Diagram of included and excluded studies


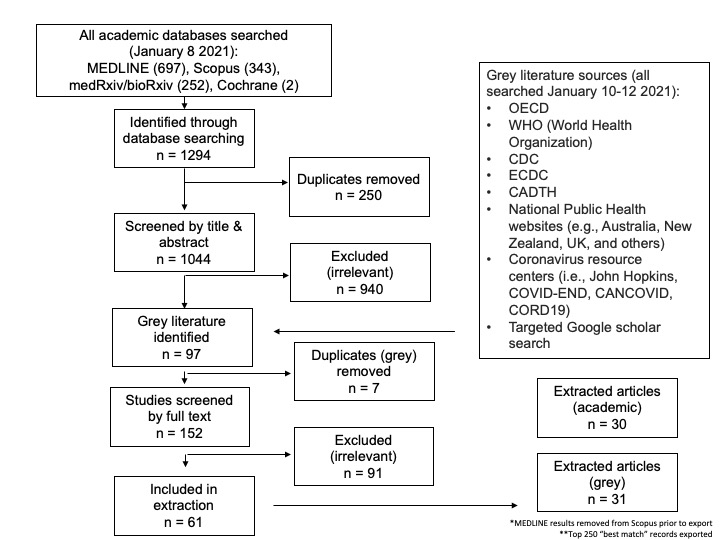

Supplement: Supplementary file 1 [file 3cec94941bd5fc9dff9917fb.docx]
